# Supplementary material
Source: publisher figshare collection journal article supplement (https://gsajournals.figshare.com/articles/dataset/_/12493769)
Supplement: Supplementary file 3 [file 2]

# Supplemental Information

| Name                    | Strain | Genotype                                                                                            |
|-------------------------|--------|-----------------------------------------------------------------------------------------------------|
| Figure 1                |        |                                                                                                     |
| WT                      | JPS915 | <i>vxEx893[pmyo-2::mCherry::unc-54 UTR]; vxIs591[ptph-1::GFP::unc-54 UTR]</i>                       |
|                         | JPS977 | <i>vxEx947[pmyo-2::mCherry::unc-54 UTR]; vxIs591</i>                                                |
| APP                     | JPS916 | <i>vxEx893; vxIs808[SC_prab-3::APP::mCherry::unc-54 UTR]; vxIs591</i>                               |
|                         | JPS917 | <i>vxEx947; vxIs808; vxIs591</i>                                                                    |
| exAPOE3                 | JPS918 | <i>vxEx894[prab-3::ApoE3::unc-54 UTR (15 ng/μL), pmyo-2::mCherry::unc-54 UTR]; vxIs591</i>          |
|                         | JPS952 | <i>vxEx944[prab-3::ApoE3::unc-54 UTR (15 ng/μL), pmyo-2::mCherry::unc-54 UTR]; vxIs591</i>          |
| exAPOE3+APP             | JPS919 | <i>vxEx894; vxIs808; vxIs591</i>                                                                    |
|                         | JPS953 | <i>vxEx944; vxIs808; vxIs591</i>                                                                    |
| exAPOE3h+APP            | JPS954 | <i>vxEx945[prab-3::ApoE3::unc-54 UTR (30 ng/μL), pmyo-2::mCherry::unc-54 UTR]; vxIs808; vxIs591</i> |
|                         | JPS955 | <i>vxEx946[prab-3::ApoE3::unc-54 UTR (30 ng/μL), pmyo-2::mCherry::unc-54 UTR]; vxIs808; vxIs591</i> |
| exAPOE4                 | JPS973 | <i>vxEx948[prab-3::ApoE4::unc-54 UTR (15 ng/μL), pmyo-2::mCherry::unc-54 UTR]; vxIs591</i>          |
|                         | JPS975 | <i>vxEx949[prab-3::ApoE4::unc-54 UTR (15 ng/μL), pmyo-2::mCherry::unc-54 UTR]; vxIs591</i>          |
| exAPOE4+APP             | JPS974 | <i>vxEx948; vxIs808; vxIs591</i>                                                                    |
|                         | JPS976 | <i>vxEx949; vxIs808; vxIs591</i>                                                                    |
| Figure 2                |        |                                                                                                     |
| WT                      | JPS617 | <i>vxIs591</i>                                                                                      |
| APP                     | JPS809 | <i>vxIs808; vxIs591</i>                                                                             |
| SC_APL-1                | JPS770 | <i>vxSi770[SC_Prab-3::APL-1::mCherry::APL-1 UTR]</i>                                                |
| SC_APL-1+ green neurons | JPS799 | <i>vxSi770; vxIs591</i>                                                                             |
| exAPOE4                 | JPS975 | <i>vxEx949; vxIs591</i>                                                                             |

## Supplemental Information

|                      |         |                                  |
|----------------------|---------|----------------------------------|
| APP+exAPOE4          | JPS974  | <i>vxEx948; vxls808; vxls591</i> |
| SC_APL-1<br>+exAPOE4 | JPS1166 | <i>vxSi770; vxEx949; vxls591</i> |

Figure 3

|           |         |                                                                                   |
|-----------|---------|-----------------------------------------------------------------------------------|
| WT        | JPS617  | <i>vxls591</i>                                                                    |
| APP       | JPS809  | <i>vxls808; vxls591</i>                                                           |
| APOE3     | JPS1312 | <i>sybls2443[prab-3::ApoE3::unc-54 UTR, pmyo-2::mCherry::unc-54 UTR]; vxls591</i> |
| APOE4     | JPS844  | <i>vxls824[prab-3::ApoE4::unc-54 UTR, pmyo-2::mCherry::unc-54 UTR], vxls591</i>   |
| APOE4+APP | JPS845  | <i>vxls808; vxls824, vxls591</i>                                                  |

Figure 4

|           |         |                                                                    |
|-----------|---------|--------------------------------------------------------------------|
| WT        | JPS999  | <i>vxEx989[pdel-1::GFP::unc-54 UTR, punc-122::GFP::unc-54 UTR]</i> |
| APOE4+APP | JPS1000 | <i>vxEx989; vxls808; vxls824; vxls591</i>                          |

Figure 5

|                               |        |                                                                                            |
|-------------------------------|--------|--------------------------------------------------------------------------------------------|
| APP                           | JPS809 | <i>vxls808; vxls591</i>                                                                    |
| APP+exAPOE4 -<br>intestine    | JPS932 | <i>vxEx895[pfat-7::ApoE4::unc-54 UTR, pmyo-2::mCherry::unc-54 UTR]; vxls808; vxls591</i>   |
|                               | JPS933 | <i>vxEx896[pfat-7::ApoE4::unc-54 UTR, pmyo-2::mCherry::unc-54 UTR]; vxls808; vxls591</i>   |
| APP+exAPOE4 -<br>coelomocytes | JPS938 | <i>vxEx990[punc-122::ApoE4::unc-54 UTR, pmyo-2::mCherry::unc-54 UTR]; vxls808; vxls591</i> |
|                               | JPS939 | <i>vxEx991[punc-122::ApoE4::unc-54 UTR, pmyo-2::mCherry::unc-54 UTR]; vxls808; vxls591</i> |
| APP+exAPOE4 -<br>neurons      | JPS974 | <i>vxEx948; vxls808; vxls591</i>                                                           |
|                               | JPS976 | <i>vxEx949; vxls808; vxls591</i>                                                           |

Figure 6

|                         |        |                                                   |
|-------------------------|--------|---------------------------------------------------|
| APOE4+APP               | JPS845 | <i>vxls808; vxls824, vxls591</i>                  |
| APOE4+APP; <i>ced-3</i> | JPS972 | <i>vxls808; ced-3(n1286) IV; vxls824, vxls591</i> |

Figure S1

## Supplemental Information

|              |         |                                                                                   |
|--------------|---------|-----------------------------------------------------------------------------------|
| APP+exAPOE4  | JPS974  | <i>vxEx948; vxIs808; vxIs591</i>                                                  |
| Figure S2    |         |                                                                                   |
| APP          | JPS809  | <i>vxIs808; vxIs591</i>                                                           |
| APP+exAPOE4  | JPS974  | <i>vxEx948; vxIs808; vxIs591</i>                                                  |
| Figure S3    |         |                                                                                   |
| WT           | JPS617  | <i>vxIs591</i>                                                                    |
| IsAPOE3      | JPS1312 | <i>sybIs2443[prab-3::ApoE3::unc-54 UTR, pmyo-2::mCherry::unc-54 UTR]; vxIs591</i> |
| IsAPOE4+APP  | JPS845  | <i>vxIs808; vxIs824, vxIs591</i>                                                  |
| exAPOE3h+APP | JPS954  | <i>vxEx945; vxIs808; vxIs591</i>                                                  |
| exAPOE4      | JPS975  | <i>vxEx949; vxIs591</i>                                                           |
